# Supplementary material for: Relation between plasma ceramides and cardiovascular death in chronic heart failure: A subset analysis of the GISSI‐HF trial
Source: PubMed Central journal article supplement — ESC Heart Fail. 2020 Jul 6;7(6):3288–97. doi: 10.1002/ehf2.12885 (PMC7754905; doi:10.1002/ehf2.12885), 2020-07-06
Supplement: EHF2-7-3288-s001.pdf [file EHF2-7-3288-s001.pdf]

|                         | Crude values                                                                                                                                | Ratios with Cer(d18:1/24:0)                                                                                                               |
|-------------------------|---------------------------------------------------------------------------------------------------------------------------------------------|-------------------------------------------------------------------------------------------------------------------------------------------|
| <b>Cer (d18:1/16:0)</b> | 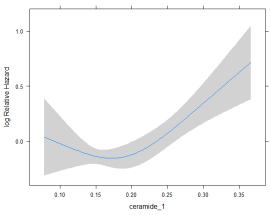 <p><math>P_{\text{non-linearity}} = 0.014</math></p>      |  <p><math>P_{\text{non-linearity}} = 0.030</math></p>   |
| <b>Cer (d18:1/18:0)</b> |  <p><math>P_{\text{non-linearity}} = 0.254</math></p>      |  <p><math>P_{\text{non-linearity}} = 0.242</math></p>   |
| <b>Cer (d18:1/20:0)</b> |  <p><math>P_{\text{non-linearity}} = 0.020</math></p>      |  <p><math>P_{\text{non-linearity}} = 0.396</math></p>   |
| <b>Cer (d18:1/22:0)</b> |  <p><math>P_{\text{non-linearity}} &lt; 0.001</math></p>  |  <p><math>P_{\text{non-linearity}} = 0.107</math></p>  |
| <b>Cer (d18:1/24:0)</b> |  <p><math>P_{\text{non-linearity}} &lt; 0.001</math></p> | <i>No ratio</i>                                                                                                                           |
| <b>Cer (d18:1/24:1)</b> |  <p><math>P_{\text{non-linearity}} = 0.790</math></p>    |  <p><math>P_{\text{non-linearity}} = 0.451</math></p> |
